# Supplementary material for: Using graphene oxide as a sacrificial support of polyoxotitanium clusters to replicate its two-dimensionality on pure titania photocatalysts
Source: Royal Society of Chemistry journal article supplement (doi:10.1039/c5ta09989g), 2016-01-01
Supplement: c5ta09989g1.pdf [file c5ta09989g1.pdf]

## SUPPORTING INFORMATION

### Using graphene oxide as a sacrificial support of polyoxotitanium clusters to replicate its two-dimensionality on pure titania photocatalysts

Salvador Eslava,<sup>\*a</sup> Anna Reynal,<sup>b</sup> Victoria G. Rocha,<sup>c</sup> Suelen Barg,<sup>d</sup> and Eduardo Saiz<sup>c</sup>

<sup>a</sup> Department of Chemical Engineering, University of Bath, Bath BA2 7AY, UK. Email: [s.eslava@bath.ac.uk](mailto:s.eslava@bath.ac.uk)

<sup>b</sup> School of Science and Engineering, Teesside University, Middlesbrough TS1 3BA, UK.

<sup>c</sup> Centre for Advanced Structural Ceramics, Department of Materials, Imperial College London, London SW7 2BP, UK.

<sup>d</sup> School of Materials, University of Manchester, Oxford Rd, Manchester M13 9PL, UK.

**KEYWORDS:** photocatalysis, water splitting, titania, graphene, methanol reforming, nanoparticles, hydrogen.

E-mail: [s.eslava@bath.ac.uk](mailto:s.eslava@bath.ac.uk)

All data supporting this paper are openly available from the University of Bath data archive at

<http://doi.org/10.15125/BATH-00156>

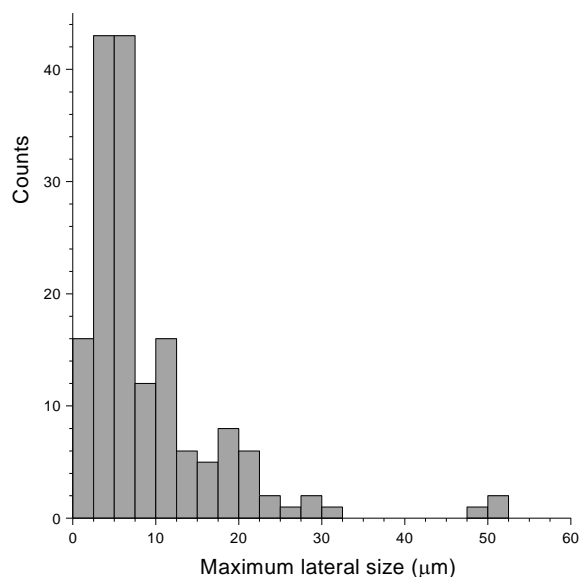

Figure S1. Histogram of the maximum lateral size distribution of GO mats (over 163 counts).

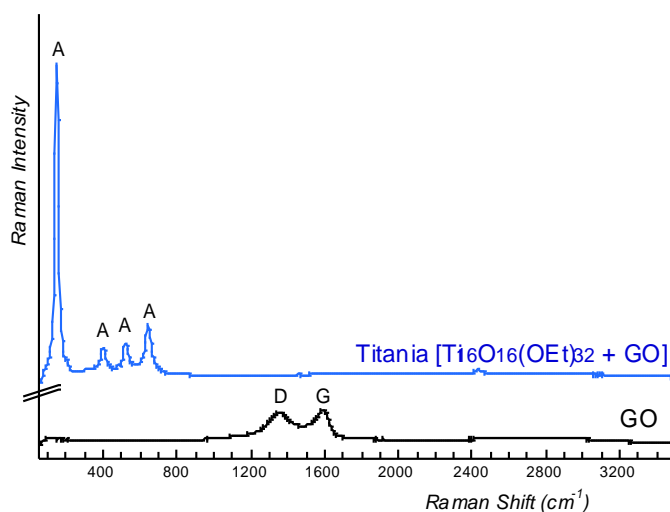

Figure S2. Raman spectra of GO and titania prepared by dissolving, drying and calcining  $\text{Ti}_{16}\text{O}_{16}(\text{OEt})_{32}$  clusters together with GO. A stands for anatase. Graphene oxide Raman bands D and G are indicated.
